# Supplementary material
Source: PubMed Central journal article supplement (PMC3120904)
Supplement: NIHMS271756-supplement-Supplementary_Data.pdf [file NIHMS271756-supplement-Supplementary_Data.pdf]

**Web Based Supplementary Material for Combining Disease Models to test for Gene-Environment Interaction in Nuclear Families by Thomas J. Hoffmann, Stijn Vansteelandt, Christoph Lange, Edwin K. Silverman, Dawn L. DeMeo, and Nan M. Laird**

**Web Appendix A: Conditional independence of the gene and environment given the sufficient statistic for parental mating type**

Here we drop the subscript  $i$  from our notation, and partition  $P$  into  $P^{\text{obs}}$  and  $P^{\text{mis}}$ , the genotypes of the observed and missing parents, where  $P^{\text{obs}}$  can be null. The independence of  $\mathbf{X}$  and  $\mathbf{Z}$  given  $S$  follows from two properties of the sufficient statistic: it depends only on observed genotype data and the distribution of  $\mathbf{X}$  given  $S$  and  $P^{\text{mis}}$  does not depend on  $P^{\text{mis}}$ . We assume

- (1)  $\mathbf{X}$  and  $\mathbf{Z}$  are independent given  $P$ .
- (2)  $S$  is solely determined by  $\mathbf{X}$  and  $P^{\text{obs}}$ .

A formal argument can be given as follows. Because  $S$  is a function only of  $P^{\text{obs}}$  and  $\mathbf{X}$ , we can write

$$Pr(\mathbf{X}, \mathbf{Z}, P) \propto Pr(\mathbf{X}, \mathbf{Z}, S, P^{\text{mis}})$$

but by assumption 1,

$$Pr(\mathbf{X}, \mathbf{Z}, S, P^{\text{mis}}) = Pr(\mathbf{X}|S, P^{\text{mis}})Pr(\mathbf{Z}|S, P^{\text{mis}})Pr(P^{\text{mis}}|S)Pr(S)$$

because  $S$  and  $P^{\text{mis}}$  together give  $P$ . Additionally, by definition of the sufficient statistic,  $Pr(\mathbf{X}|S, P^{\text{mis}}) = Pr(\mathbf{X}|S)$ , hence summing of the above equation over the  $P^{\text{mis}}$  and dividing by  $Pr(S)$  gives  $Pr(\mathbf{X}, \mathbf{Z}|S) \propto Pr(\mathbf{X}|S)Pr(\mathbf{Z}|S)$ , and hence  $Pr(\mathbf{X}, \mathbf{Z}|S)$  factors.

## Web Appendix B: Further details of the TX method

Here we fill in the missing details for the derivation in Section 2.1. A detailed derivation of the likelihood for the log link proceeds as follows. Continuing from equation 3 in the paper, the retrospective likelihood is given by

$$\begin{aligned}\mathcal{L}_i^{\text{TX}} &= Pr(\mathbf{X}_i | \mathbf{Y}_i = 1, \mathbf{Z}_i, S_i) \\ &= \frac{Pr(\mathbf{Y}_i = 1 | \mathbf{X}_i, \mathbf{Z}_i, S_i) Pr(\mathbf{X}_i, \mathbf{Z}_i | S_i)}{\sum_{\mathbf{X}^* \in S_i} Pr(\mathbf{Y}_i = 1 | \mathbf{X}^*, \mathbf{Z}_i, S_i) Pr(\mathbf{X}^*, \mathbf{Z}_i | S_i)}.\end{aligned}$$

Hoffmann et al. (2009) and Web Appendix A show that conditional independence of the genotype and exposure given the parents ( $P$ ) implies conditional independence of the genotype and exposure given the sufficient statistic for parental mating type (i.e.  $\mathbf{X} \perp \mathbf{Z} | P \Rightarrow \mathbf{X} \perp \mathbf{Z} | S$ ). Using this result, and the assumption in equation 2, we have

$$\begin{aligned}\mathcal{L}_i^{\text{TX}} &= \frac{\left\{ \prod_j Pr(Y_{ij} = 1 | \mathbf{X}_{ij}, Z_{ij}, S_i) \right\} Pr(\mathbf{X}_i | S_i)}{\sum_{\mathbf{X}^* \in S_i} \left\{ \prod_j Pr(Y_{ij} = 1 | \mathbf{X}_j^*, Z_{ij}, S_i) \right\} Pr(\mathbf{X}^* | S_i)} \\ &= \frac{e^{\beta_{\text{ge}}^T \sum_j \mathbf{X}_{\text{ge},ij} Z_{ij} + \beta_{\text{g}}^T \sum_j \mathbf{X}_{ij}} Pr(\mathbf{X}_i | S_i)}{\sum_{\mathbf{X}^* \in S_i} e^{\beta_{\text{ge}}^T \sum_j \mathbf{X}_{\text{ge},j}^* Z_{ij} + \beta_{\text{g}}^T \sum_j \mathbf{X}_j^*} Pr(\mathbf{X}^* | S_i)}.\end{aligned}$$

Then the log-likelihood is given by equation 4. Then the test statistic is computed as described in Section 2.1 following after equation 4. For the test statistic, we need a few derivatives that we present here now. The derivative of  $\ell_{i, \text{TX}}$  is given in equation 5, where

$$\begin{aligned}E \left\{ \sum_j \begin{pmatrix} \mathbf{X}_{\text{ge},ij} Z_{ij} \\ \mathbf{X}_{ij} \end{pmatrix} \middle| \mathbf{Y}_i = 1, \mathbf{Z}_i, S_i; \boldsymbol{\beta} \right\} \\ = \frac{\sum_{\mathbf{X}^* \in S_i} \left\{ \sum_j \begin{pmatrix} \mathbf{X}_{\text{ge},j}^* Z_{ij} \\ \mathbf{X}_j^* \end{pmatrix} \right\} e^{\beta_{\text{ge}}^T \sum_j \mathbf{X}_{\text{ge},j}^* Z_{ij} + \beta_{\text{g}}^T \sum_j \mathbf{X}_j^*} Pr(\mathbf{X}^* | S_i)}{\sum_{\mathbf{X}^* \in S_i} e^{\beta_{\text{ge}}^T \sum_j \mathbf{X}_{\text{ge},j}^* Z_{ij} + \beta_{\text{g}}^T \sum_j \mathbf{X}_j^*} Pr(\mathbf{X}^* | S_i)}.\end{aligned}$$

Lastly, to compute  $W_i$ , we need the following second derivatives. Let

$$A_{i,a,b} = \sum_{\mathbf{g}^* \in S_i} \left( \sum_j \mathbf{X}_{\text{ge},j}^* Z_{ij} \right)^{\otimes a} \left\{ \left( \mathbf{X}_{\text{ge},j}^* \mathbf{X}_j^* \right)^{\otimes b} \right\}^T e^{\beta_{\text{ge}}^T \sum_j \mathbf{X}_{\text{ge},j}^* Z_{ij} + \beta_{\text{g}}^T \sum_j \mathbf{X}_j^*} Pr(\mathbf{X}^* | S_i),$$

where we define  $M^{\otimes 0} = 1$ ,  $M^{\otimes 1} = M$ , and  $M^{\otimes 2} = MM^T$ . Then we have

$$\frac{\partial}{\partial \beta_{\text{nuis}}} U_i^{\beta_{\text{ge}}}(\boldsymbol{\beta}) = \frac{A_{i,1,1}A_{i,0,0} - A_{i,1,0}A_{i,0,1}}{A_{i,0,0}^2} \quad (1)$$

$$\frac{\partial}{\partial \beta_{\text{nuis}}} U_i^{\beta_{\text{e}}}(\boldsymbol{\beta}) = \frac{A_{i,0,2}^T A_{i,0,0} - (A_{i,0,1}^T)^{\otimes 2}}{A_{i,0,0}^2}. \quad (2)$$

### Web Appendix C: Distribution of $W_i$

From a Taylor series expansion, we have that

$$\begin{aligned} n^{-1/2} \sum_i U_i^{\text{ge}}(\boldsymbol{\beta}_{\text{ge}}, \hat{\boldsymbol{\beta}}_{\text{nuis}}) &= n^{-1/2} \sum_i U_i^{\text{ge}}(\boldsymbol{\beta}_{\text{ge}}, \boldsymbol{\beta}_{\text{nuis}}) \\ &\quad + n^{-1/2} \sum_i E \left\{ \frac{\partial}{\partial \boldsymbol{\beta}_{\text{nuis}}} U_i^{\text{ge}}(\boldsymbol{\beta}_{\text{ge}}, \boldsymbol{\beta}_{\text{nuis}}) \right\} (\hat{\boldsymbol{\beta}}_{\text{nuis}} - \boldsymbol{\beta}_{\text{nuis}}) + o_p(1) \\ n^{-1/2} \sum_i U_i^{\text{nuis}}(\boldsymbol{\beta}_{\text{ge}}, \hat{\boldsymbol{\beta}}_{\text{nuis}}) &= n^{-1/2} \sum_i U_i^{\text{nuis}}(\boldsymbol{\beta}_{\text{ge}}, \boldsymbol{\beta}_{\text{nuis}}) \\ &\quad + n^{-1/2} \sum_i E \left\{ \frac{\partial}{\partial \boldsymbol{\beta}_{\text{nuis}}} U_i^{\text{nuis}}(\boldsymbol{\beta}_{\text{ge}}, \boldsymbol{\beta}_{\text{nuis}}) \right\} (\hat{\boldsymbol{\beta}}_{\text{nuis}} - \boldsymbol{\beta}_{\text{nuis}}) + o_p(1) \\ &= n^{-1/2} \sum_i E \left\{ \frac{\partial}{\partial \boldsymbol{\beta}_{\text{nuis}}} U_i^{\text{nuis}}(\boldsymbol{\beta}_{\text{ge}}, \boldsymbol{\beta}_{\text{nuis}}) \right\} (\hat{\boldsymbol{\beta}}_{\text{nuis}} - \boldsymbol{\beta}_{\text{nuis}}) + o_p(1). \end{aligned}$$

Hence  $n^{-1/2} \sum_i U_i^{\text{ge}}(\boldsymbol{\beta}_{\text{ge}}, \hat{\boldsymbol{\beta}}_{\text{nuis}}) =$

$$\begin{aligned} &n^{-1/2} \sum_i U_i^{\text{ge}}(\boldsymbol{\beta}_{\text{ge}}, \boldsymbol{\beta}_{\text{nuis}}) \\ &\quad + n^{-1/2} \sum_i E \left\{ \frac{\partial}{\partial \boldsymbol{\beta}_{\text{nuis}}} U_i^{\text{ge}}(\boldsymbol{\beta}_{\text{ge}}, \boldsymbol{\beta}_{\text{nuis}}) \right\} E \left\{ \frac{\partial}{\partial \boldsymbol{\beta}_{\text{nuis}}} U_i^{\text{nuis}}(\boldsymbol{\beta}_{\text{ge}}, \boldsymbol{\beta}_{\text{nuis}}) \right\}^{-} U_i^{\text{nuis}}(\boldsymbol{\beta}_{\text{ge}}, \hat{\boldsymbol{\beta}}_{\text{nuis}}) \\ &\quad + o_p(1). \end{aligned} \quad (3)$$

It now follows from the central limit theorem that  $W_i$  follows an asymptotically multivariate normal distribution, with variance that can be consistently estimated by the right hand side of the expression in web equation 3, replacing  $\boldsymbol{\beta}_{\text{nuis}}$  with  $\hat{\boldsymbol{\beta}}_{\text{nuis}}$ . The test has  $\text{rank}(\sum_i W_i W_i^T)$  degrees of freedom.

### Web Appendix D: Further details of CLR-IJ

Here we fill in the missing details in the derivation in section 2.2.2. We continue from equation 7 in the paper. Calculations follow Chatterjee et al. (2005), but use the more general sibship.

We have

$$\begin{aligned}\mathcal{L}_i^{\text{CLR-IJ}} &= Pr\{\mathbf{Y}_{i,A(\mathbf{Y}_i)} = \mathbf{1}, \mathbf{Y}_{i,U(\mathbf{Y}_i)} = \mathbf{0}, \mathbf{X}_i | \mathbf{Y}_{i+}, S_i, \mathbf{Z}_i, \mathbf{C}_i; \boldsymbol{\beta}\} \\ &= Pr\{\mathbf{Y}_{i,A(\mathbf{Y}_i)} = \mathbf{1}, \mathbf{Y}_{i,U(\mathbf{Y}_i)} = \mathbf{0} | \mathbf{X}_i, \mathbf{Y}_{i+}, S_i, \mathbf{Z}_i, \mathbf{C}_i; \boldsymbol{\beta}\} Pr(\mathbf{X}_i | \mathbf{Y}_{i+}, S_i, \mathbf{Z}_i, \mathbf{C}_i; \boldsymbol{\beta}) \\ &:= \mathcal{L}_i^{\text{CLR}} \mathcal{L}_i^*,\end{aligned}$$

where  $\mathcal{L}_i^{\text{CLR}}$  is the likelihood from conditional logistic regression (Witte et al., 1999; Siegmund et al., 2000; Weinberg, 2000). The term  $\mathcal{L}_i^*$  may resemble the term in  $\mathcal{L}_i^{\text{TX}}$ , except that the latter only includes affected offspring, whereas the former used here includes all offspring.

Now, working with just the second term, we have

$$\begin{aligned}\mathcal{L}_i^* &= \frac{Pr(\mathbf{Y}_{i+} | \mathbf{X}_i, S_i, \mathbf{Z}_i, \mathbf{C}_i, \boldsymbol{\beta}) Pr(\mathbf{X}_i | S_i, \mathbf{Z}_i, \mathbf{C}_i, \boldsymbol{\beta})}{\sum_{\mathbf{X}^* \in \mathcal{S}_i} Pr(\mathbf{Y}_{i+} | \mathbf{X}_i^*, S_i, \mathbf{Z}_i, \mathbf{C}_i, \boldsymbol{\beta}) Pr(\mathbf{X}_i^* | S_i, \mathbf{Z}_i, \mathbf{C}_i, \boldsymbol{\beta})} \\ &= \frac{Pr(\mathbf{Y}_{i+} | \mathbf{X}_i, S_i, \mathbf{Z}_i, \mathbf{C}_i, \boldsymbol{\beta}) Pr(\mathbf{X}_i | S_i)}{\sum_{\mathbf{X}^* \in \mathcal{S}_i} Pr(\mathbf{Y}_{i+} | \mathbf{X}_i^*, S_i, \mathbf{Z}_i, \mathbf{C}_i, \boldsymbol{\beta}) Pr(\mathbf{X}_i^* | S_i)}\end{aligned}$$

by the assumption that  $\mathbf{X} \perp \mathbf{Z} | P$  (which implies  $\mathbf{X} \perp \mathbf{Z} | S$  as shown in Hoffmann et al. (2009) and Web Appendix A). Next, assuming phenotypic independence of the sibs and using equation 1 we have that  $Pr(\mathbf{Y}_{i+} | \mathbf{X}_i, S_i, \mathbf{Z}_i, \mathbf{C}_i; \boldsymbol{\beta})$

$$\begin{aligned}&= \sum_{\mathbf{Y}^*: \mathbf{Y}_+^* = \mathbf{Y}_{i+}} Pr(\mathbf{Y}_i = \mathbf{Y}^* | \mathbf{X}_i, \mathbf{Z}_i, \mathbf{C}_i; \boldsymbol{\beta}) \\ &= \sum_{\mathbf{Y}^*: \mathbf{Y}_+^* = \mathbf{Y}_{i+}} \left\{ \prod_{j \in A(\mathbf{Y}^*)} Pr(Y_j = 1 | \mathbf{X}_{ij}, Z_{ij}, \mathbf{C}_{ij}; \boldsymbol{\beta}) \right\} \left\{ \prod_{j \in U(\mathbf{Y}^*)} Pr(Y_j = 0 | \mathbf{X}_{ij}, Z_{ij}, \mathbf{C}_{ij}; \boldsymbol{\beta}) \right\} \\ &= \sum_{\mathbf{Y}^*: \mathbf{Y}_+^* = \mathbf{Y}_{i+}} \frac{\prod_{j \in A(\mathbf{Y}^*)} e^{\alpha_i} e^{h(\mathbf{X}_{ij}, Z_{ij}, \mathbf{C}_{ij}; \boldsymbol{\beta})}}{\prod_{\mathbf{Y}^*: \mathbf{Y}_+^* = \mathbf{Y}_{i+}} \left\{ 1 + \prod_{j \in \mathbf{Y}^*} e^{\alpha_i} e^{h(\mathbf{X}_{ij}, Z_{ij}, \mathbf{C}_{ij}; \boldsymbol{\beta})} \right\}} \\ &\approx \sum_{\mathbf{Y}^*: \mathbf{Y}_+^* = \mathbf{Y}_{i+}} \left\{ \prod_{j \in A(\mathbf{Y}^*)} e^{\alpha_i} e^{h(\mathbf{X}_{ij}, Z_{ij}, \mathbf{C}_{ij}; \boldsymbol{\beta})} \right\}\end{aligned}$$

under the rare disease assumption, where

$$h(\mathbf{X}_{ij}, Z_{ij}, \mathbf{C}_{ij}; \boldsymbol{\beta}) = \boldsymbol{\beta}_{\text{ge}}^T \mathbf{X}_{\text{ge},j}^* Z_{ij} + \boldsymbol{\beta}_{\text{nuis}}^T \mathbf{m}(\mathbf{X}_j^*, Z_{ij}, \mathbf{C}_{ij}).$$

Then we have that

$$\mathcal{L}_i^* = \frac{\left\{ \sum_{\mathbf{Y}^*: \mathbf{Y}_+^* = \mathbf{Y}_{i+}} \prod_{j \in A(\mathbf{Y}^*)} e^{h(\mathbf{X}_{ij}, Z_{ij}, \mathbf{C}_{ij}; \boldsymbol{\beta})} \right\} Pr(\mathbf{X}_i | S_i)}{\sum_{\mathbf{X}^* \in S_i} \left\{ \sum_{\mathbf{Y}^*: \mathbf{Y}_+^* = \mathbf{Y}_{i+}} \prod_{j \in A(\mathbf{Y}^*)} e^{h(\mathbf{X}_{ij}, Z_{ij}, \mathbf{C}_{ij}; \boldsymbol{\beta})} \right\} Pr(\mathbf{X}_i^* | S_i)}.$$

Putting these two back together leaves us with

$$\begin{aligned} \mathcal{L}_i^{\text{CLR-IJ}} &= \frac{\left\{ \prod_{j \in A(\mathbf{Y}_i)} e^{h(\mathbf{X}_{ij}, Z_{ij}, \mathbf{C}_{ij}; \boldsymbol{\beta})} \right\} Pr(\mathbf{X}_i | S_i)}{\sum_{\mathbf{X}^* \in S_i} \left\{ \sum_{\mathbf{Y}^*: \mathbf{Y}_+^* = \mathbf{Y}_{i+}} \prod_{j \in A(\mathbf{Y}^*)} e^{h(\mathbf{X}_{ij}, Z_{ij}, \mathbf{C}_{ij}; \boldsymbol{\beta})} \right\} Pr(\mathbf{X}_i^* | S_i)} \\ &= \frac{e^{\sum_{j \in A(\mathbf{Y}_i)} h(\mathbf{X}_{ij}, Z_{ij}, \mathbf{C}_{ij}; \boldsymbol{\beta})} Pr(\mathbf{X}_i | S_i)}{\sum_{\mathbf{X}^* \in S_i, \mathbf{Y}^*: \mathbf{Y}_+^* = \mathbf{Y}_{i+}} e^{\sum_{j \in A(\mathbf{Y}^*)} h(\mathbf{X}_{ij}, Z_{ij}, \mathbf{C}_{ij}; \boldsymbol{\beta})} Pr(\mathbf{X}_i^* | S_i)}. \end{aligned}$$

Then the log-likelihood is given by equation 7 in the paper. Then the test statistic is computed as described in section 2.2.2, with the derivatives given here. The derivative of the log-likelihood is as given in equation 11, where

$$\begin{aligned} &E \left[ \sum_{j \in A(\mathbf{Y}_i)} \left\{ \begin{array}{c} \mathbf{X}_{\text{ge},ij} Z_{ij} \\ \mathbf{m}(\mathbf{X}_{ij}, Z_{ij}, \mathbf{C}_{ij}) \end{array} \right\} \middle| \mathbf{Y}_{i+}, \mathbf{Z}_i, \mathbf{C}_i, S_i; \boldsymbol{\beta} \right] \\ &= \frac{\sum_{\substack{\mathbf{X}^* \in S_i, \\ \mathbf{Y}^*: \mathbf{Y}_+^* = \mathbf{Y}_{i+}}} \left[ \sum_{j \in A(\mathbf{Y}^*)} \left\{ \begin{array}{c} \mathbf{X}_{\text{ge},j}^* Z_{ij} \\ \mathbf{m}(\mathbf{X}_j^*, Z_{ij}, \mathbf{C}_{ij}) \end{array} \right\} \right] e^{\sum_{j \in A(\mathbf{Y}^*)} \beta_{\text{ge}}^T \mathbf{X}_{\text{ge},j}^* Z_{ij} + \beta_{\text{nuis}}^T \mathbf{m}(\mathbf{X}_j^*, Z_{ij}, \mathbf{C}_{ij})} Pr(\mathbf{X}^* | S_i)}{\sum_{\substack{\mathbf{X}^* \in S_i, \\ \mathbf{Y}^*: \mathbf{Y}_+^* = \mathbf{Y}_{i+}}} e^{\sum_{j \in A(\mathbf{Y}^*)} \beta_{\text{ge}}^T \mathbf{X}_{\text{ge},j}^* Z_{ij} + \beta_{\text{nuis}}^T \mathbf{m}(\mathbf{X}_j^*, Z_{ij}, \mathbf{C}_{ij})} Pr(\mathbf{X}^* | S_i)}. \end{aligned}$$

For the second derivatives, redefine

$$\begin{aligned} A_{i,a,b} &= \sum_{\mathbf{X}^* \in S_i, \mathbf{Y}^*: \mathbf{Y}_+^* = \mathbf{Y}_{i+}} \left( \sum_j \mathbf{X}_{\text{ge},j}^* Z_{ij} \right)^{\otimes a} \left[ \left\{ \sum_j \mathbf{m}(\mathbf{X}_j^*, Z_{ij}, \mathbf{C}_{ij}) \right\}^{\otimes b} \right]^T \\ &\quad \times e^{\sum_{j \in A(\mathbf{Y}^*)} \beta_{\text{ge}} \mathbf{X}_{\text{ge},j}^* Z_{ij} + \beta_{\text{g}}^T \mathbf{X}_j^*} Pr(\mathbf{X}^* | S_i). \end{aligned}$$

Then the second derivatives are given by web equations 1 and 2.

## Web Appendix E: Additional type I error simulations

Web Figure 1 shows further simulation results looking at type I error under the log link by population prevalence in Web Figure 1(a) and when there is arbitrary phenotype correlation in Web Figure 1(b).

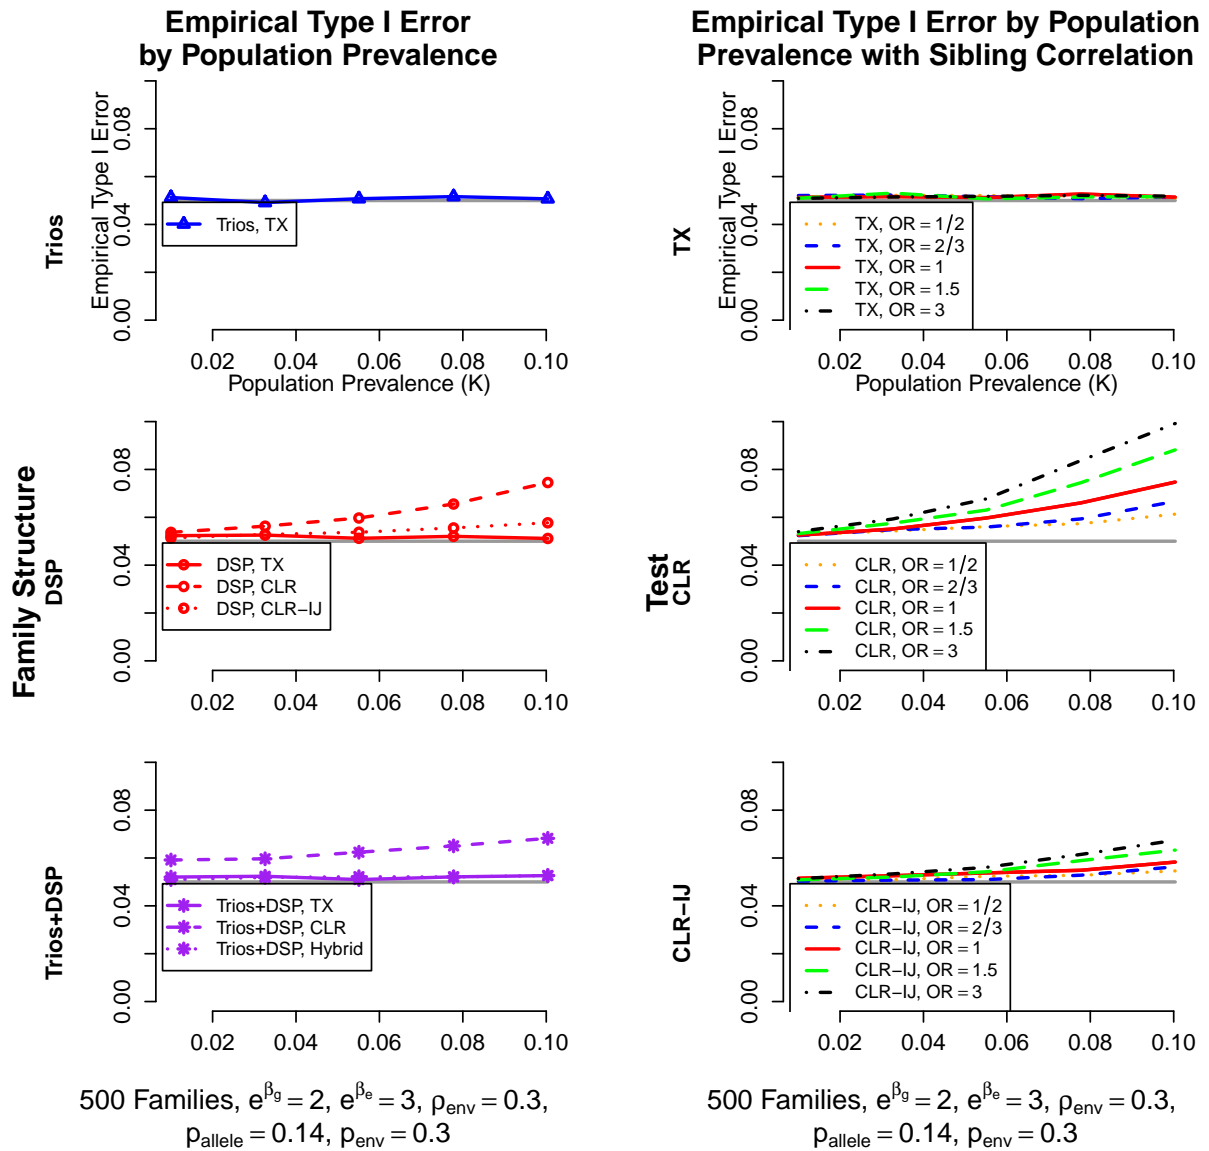

(a) Simulation study to assess type I error for a dichotomous exposure with strong main effects for 500 families under the log link. Based on 100,000 simulations. The gray line is drawn at 0.05.

(b) Simulation study to assess type I error for the effect of arbitrary phenotypic correlation in DSP (failure of assumption 2) under the log link. Based on 100,000 simulations.

**Figure 1.** Type I error and phenotypic model robustness simulations under the log link.

## Web Appendix F: Further power results

In Figure 2 we show the effect of varying the environmental exposure prevalence. The case-control power approaches and surpasses the TX approach for trios as the environmental exposure prevalence increases.

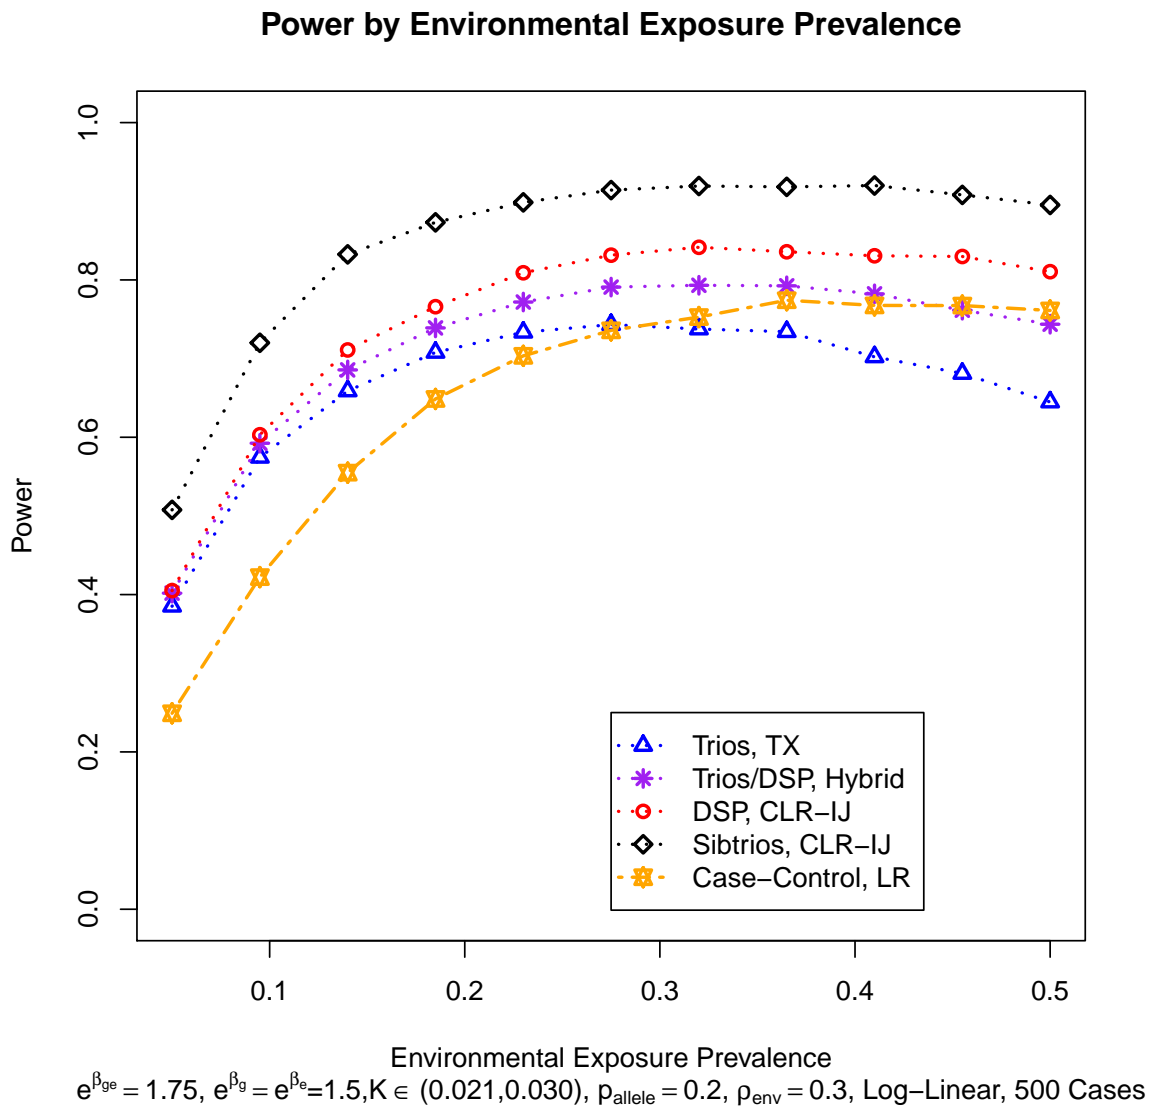

**Figure 2.** Power of the test for a dichotomous trait by environmental exposure. Based on 10,000 simulations; approximate SE < 0.0025.

### Web Appendix G: Additional dataset information

In Web Figure 3 we show the SNPs that had joint test p-value < 0.15, that is the SNPs presented in Table 2.

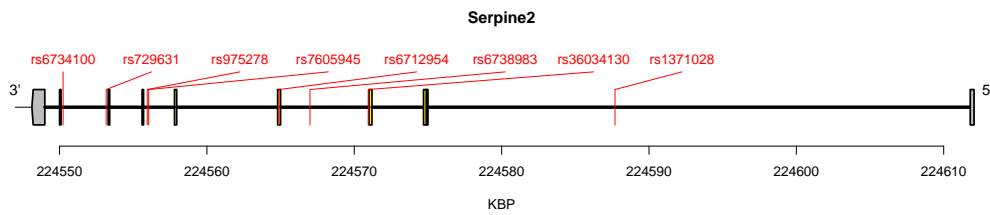

**Figure 3.** Plot of the SNPs in the Serpine2 gene with joint test p-values  $< 0.15$ , as shown in Table 2.

## References

- Chatterjee, N., Kalaylioglu, Z., and Carroll, R. J. (2005). Exploiting gene-environment independence in family-based case-control studies: increased power for detecting associations, interactions and joint effects. *Genet Epidemiol* **28**, 138–156.
- Hoffmann, T. J., Lange, C., Vansteelandt, S., and Laird, N. M. (2009). Gene-environment interaction tests for dichotomous traits in trios and sibships. *Genet Epidemiol* **33**, 691–699.
- Siegmund, K. D., Langholz, B., Kraft, P., and Thomas, D. C. (2000). Testing linkage disequilibrium in sibships. *Am J Hum Genet* **67**, 244–248.
- Weinberg, C. (2000). Re: "asymptotic bias and efficiency in case-control studies of candidate genes and gene-environment interactions: basic family designs". *Am J Epidemiol* **152**, 689–691.
- Witte, J. S., Gauderman, W. J., and Thomas, D. C. (1999). Asymptotic bias and efficiency in case-control studies of candidate genes and gene-environment interactions: basic family designs. *Am J Epidemiol* **149**, 693–705.
